# Supplementary material for: Predicting and Reconstructing Aerosol–Cloud–Precipitation Interactions with Physics-Informed Neural Networks
Source: MDPI journal article supplement (doi:10.3390/atmos14121798), 2023-12-08
Supplement: s1 [file s1]

# Predicting and Reconstructing Aerosol-Cloud-Precipitation Interactions with Physics Informed Neural Networks

Alice V. Hu <sup>1,\*</sup> and Zbigniew J. Kabala <sup>2</sup>

<sup>1</sup> Pioneer Academics, 101 Greenwood Ave, Ste 170, Jenkintown, PA 19046, USA

<sup>2</sup> Department of Civil & Environmental Engineering, Duke University, Durham, NC 27708, USA, zbigniew.kabala@duke.edu

\*Correspondence: aliceh622cg@gmail.com

## Supplementary Data

### 1. Training Data for Future Predictions without External Forcing:

| Time (min) | Cloud Depth (m) | Cloud Droplet Concentration (cm <sup>-3</sup> ) |
|------------|-----------------|-------------------------------------------------|
| 24.0       | 200.000         | 50.0000                                         |
| 28.8       | 222.809         | 58.4572                                         |
| 33.6       | 243.864         | 66.2642                                         |
| 38.4       | 263.300         | 73.4709                                         |
| 43.2       | 281.242         | 80.1236                                         |
| 48.0       | 297.805         | 86.2648                                         |
| 52.8       | 313.014         | 91.6424                                         |
| 57.6       | 326.898         | 95.9800                                         |
| 62.4       | 339.562         | 99.2913                                         |
| 67.2       | 351.110         | 101.602                                         |
| 72.0       | 361.634         | 102.951                                         |
| 76.8       | 371.219         | 103.384                                         |
| 81.6       | 379.931         | 102.964                                         |
| 86.4       | 387.825         | 101.761                                         |
| 91.2       | 394.953         | 99.8463                                         |
| 96.0       | 401.358         | 97.2965                                         |
| 100.8      | 407.079         | 94.1861                                         |
| 105.6      | 412.149         | 90.5892                                         |
| 110.4      | 416.598         | 86.5791                                         |
| 115.2      | 420.447         | 82.2271                                         |
| 120.0      | 423.716         | 77.6022                                         |
| 124.8      | 426.418         | 72.7707                                         |
| 129.6      | 428.561         | 67.7961                                         |
| 134.4      | 430.147         | 62.7387                                         |
| 139.2      | 431.171         | 57.6557                                         |
| 144.0      | 431.622         | 52.6015                                         |
| 148.8      | 431.480         | 47.6274                                         |
| 153.6      | 430.716         | 42.7823                                         |
| 158.4      | 429.290         | 38.1127                                         |
| 163.2      | 427.149         | 33.6634                                         |
| 168.0      | 424.224         | 29.4773                                         |
| 172.8      | 420.429         | 25.5968                                         |
| 177.6      | 415.655         | 22.0633                                         |
| 182.4      | 409.766         | 18.9187                                         |
| 187.2      | 402.596         | 16.2051                                         |

|       |         |         |
|-------|---------|---------|
| 192.0 | 393.945 | 13.9663 |
| 196.8 | 383.581 | 12.2477 |
| 201.6 | 371.248 | 11.0969 |
| 206.4 | 356.702 | 10.5645 |
| 211.2 | 339.778 | 10.7035 |
| 216.0 | 320.535 | 11.5689 |
| 220.8 | 299.489 | 13.2157 |
| 225.6 | 277.893 | 15.6952 |
| 230.4 | 257.862 | 19.0484 |
| 235.2 | 242.024 | 23.2948 |
| 240.0 | 232.588 | 28.4164 |
| 244.8 | 230.416 | 34.3390 |
| 249.6 | 234.837 | 40.9152 |
| 254.4 | 244.215 | 47.9240 |
| 259.2 | 256.701 | 55.0944 |
| 264.0 | 270.732 | 62.1493 |
| 268.8 | 285.201 | 68.8442 |
| 273.6 | 299.423 | 74.9847 |
| 278.4 | 313.020 | 80.4252 |
| 283.2 | 325.805 | 85.0630 |
| 288.0 | 337.706 | 88.8336 |
| 292.8 | 348.713 | 91.7077 |
| 297.6 | 358.845 | 93.6857 |

2. Training Data for Past Reconstructions without External Forcing:

| Time (min) | Cloud Depth (m) | Cloud Droplet Concentration ( $\text{cm}^{-3}$ ) |
|------------|-----------------|--------------------------------------------------|
| 450.       | 303.107         | 16.3803                                          |
| 455.       | 286.269         | 19.2137                                          |
| 460.       | 272.187         | 22.8920                                          |
| 465.       | 262.627         | 27.3998                                          |
| 470.       | 258.625         | 32.6741                                          |
| 475.       | 260.144         | 38.5912                                          |
| 480.       | 266.258         | 44.9631                                          |
| 485.       | 275.628         | 51.5511                                          |
| 490.       | 286.937         | 58.0960                                          |
| 495.       | 299.136         | 64.3521                                          |
| 500.       | 311.496         | 70.1106                                          |
| 505.       | 323.560         | 75.2092                                          |
| 510.       | 335.068         | 79.5319                                          |
| 515.       | 345.885         | 83.0066                                          |
| 520.       | 355.953         | 85.6001                                          |
| 525.       | 365.255         | 87.3120                                          |
| 530.       | 373.801         | 88.1674                                          |
| 535.       | 381.608         | 88.2105                                          |
| 540.       | 388.702         | 87.4982                                          |
| 545.       | 395.108         | 86.0963                                          |
| 550.       | 400.852         | 84.0752                                          |
| 555.       | 405.956         | 81.5080                                          |
| 560.       | 410.440         | 78.4685                                          |
| 565.       | 414.323         | 75.0298                                          |
| 570.       | 417.618         | 71.2637                                          |
| 575.       | 420.335         | 67.2400                                          |
| 580.       | 422.478         | 63.0259                                          |
| 585.       | 424.048         | 58.6858                                          |

|      |         |         |
|------|---------|---------|
| 590. | 425.038 | 54.2814 |
| 595. | 425.437 | 49.8712 |
| 600. | 425.224 | 45.5112 |
| 605. | 424.372 | 41.2546 |
| 610. | 422.842 | 37.1520 |
| 615. | 420.587 | 33.2522 |
| 620. | 417.547 | 29.6022 |
| 625. | 413.647 | 26.2474 |
| 630. | 408.801 | 23.2327 |
| 635. | 402.907 | 20.6023 |
| 640. | 395.854 | 18.4001 |
| 645. | 387.528 | 16.6707 |
| 650. | 377.827 | 15.4586 |
| 655. | 366.696 | 14.8091 |
| 660. | 354.170 | 14.7669 |
| 665. | 340.461 | 15.3756 |
| 670. | 326.043 | 16.6750 |
| 675. | 311.739 | 18.6978 |
| 680. | 298.702 | 21.4636 |
| 685. | 288.238 | 24.9709 |
| 690. | 281.456 | 29.1876 |
| 695. | 278.931 | 34.0399 |
| 700. | 280.555 | 39.4061 |
| 705. | 285.673 | 45.1170 |
| 710. | 293.360 | 50.9691 |
| 715. | 302.683 | 56.7457 |
| 720. | 312.859 | 62.2406 |
| 725. | 323.310 | 67.2757 |
| 730. | 333.643 | 71.7103 |
| 735. | 343.611 | 75.4432 |
| 740. | 353.071 | 78.4114 |
| 745. | 361.943 | 80.5865 |
| 750. | 370.190 | 81.9684 |

### 3. Training Data for Future Predictions with Wildfire–Induced Aerosol External Forcing:

| Time (min) | Cloud Depth (m) | Cloud Droplet Concentration (cm <sup>-3</sup> ) |
|------------|-----------------|-------------------------------------------------|
| 24.0       | 200.000         | 50.0000                                         |
| 28.8       | 222.809         | 58.5044                                         |
| 33.6       | 243.864         | 66.3736                                         |
| 38.4       | 263.300         | 73.6595                                         |
| 43.2       | 281.242         | 80.4099                                         |
| 48.0       | 297.805         | 86.6693                                         |
| 52.8       | 313.015         | 92.1868                                         |
| 57.6       | 326.902         | 96.6875                                         |
| 62.4       | 339.573         | 100.186                                         |
| 67.2       | 351.129         | 102.711                                         |
| 72.0       | 361.665         | 104.299                                         |
| 76.8       | 371.265         | 104.999                                         |
| 81.6       | 379.997         | 104.874                                         |
| 86.4       | 387.916         | 103.995                                         |
| 91.2       | 395.073         | 102.434                                         |
| 96.0       | 401.516         | 100.268                                         |
| 100.8      | 407.283         | 97.5702                                         |
| 105.6      | 412.410         | 94.4164                                         |

|       |         |         |
|-------|---------|---------|
| 110.4 | 416.928 | 90.8794 |
| 115.2 | 420.863 | 87.0304 |
| 120.0 | 424.238 | 82.9382 |
| 124.8 | 427.071 | 78.6687 |
| 129.6 | 429.377 | 74.2846 |
| 134.4 | 431.164 | 69.8454 |
| 139.2 | 432.440 | 65.4072 |
| 144.0 | 433.206 | 61.0227 |
| 148.8 | 433.459 | 56.7416 |
| 153.6 | 433.193 | 52.6103 |
| 158.4 | 432.398 | 48.6723 |
| 163.2 | 431.060 | 44.9687 |
| 168.0 | 429.162 | 41.5378 |
| 172.8 | 426.685 | 38.4159 |
| 177.6 | 423.611 | 35.6374 |
| 182.4 | 419.924 | 33.2349 |
| 187.2 | 415.613 | 31.2392 |
| 192.0 | 410.682 | 29.6796 |
| 196.8 | 405.156 | 28.5837 |
| 201.6 | 399.087 | 27.9769 |
| 206.4 | 392.573 | 27.8821 |
| 211.2 | 385.764 | 28.3190 |
| 216.0 | 378.869 | 29.3022 |
| 220.8 | 372.159 | 30.8401 |
| 225.6 | 365.947 | 32.9325 |
| 230.4 | 360.561 | 35.5678 |
| 235.2 | 356.298 | 38.7209 |
| 240.0 | 353.379 | 42.3499 |
| 244.8 | 351.918 | 46.3954 |
| 249.6 | 351.912 | 50.7802 |
| 254.4 | 353.251 | 55.4115 |
| 259.2 | 355.754 | 60.1853 |
| 264.0 | 359.197 | 64.9926 |
| 268.8 | 363.349 | 69.7261 |
| 273.6 | 367.997 | 74.2866 |
| 278.4 | 372.954 | 78.5882 |
| 283.2 | 378.066 | 82.5608 |
| 288.0 | 383.209 | 86.1521 |
| 292.8 | 388.290 | 89.3272 |
| 297.6 | 393.239 | 92.0668 |

4. Training Data for Past Reconstructions with Wildfire-Induced Aerosol External Forcing:

| Time (min) | Cloud Depth (m) | Cloud Droplet Concentration ( $\text{cm}^{-3}$ ) |
|------------|-----------------|--------------------------------------------------|
| 450.       | 439.081         | 87.5942                                          |
| 455.       | 438.801         | 88.4380                                          |
| 460.       | 438.573         | 89.4127                                          |
| 465.       | 438.407         | 90.5077                                          |
| 470.       | 438.310         | 91.7114                                          |
| 475.       | 438.287         | 93.0112                                          |
| 480.       | 438.343         | 94.3937                                          |
| 485.       | 438.479         | 95.8453                                          |
| 490.       | 438.695         | 97.3522                                          |
| 495.       | 438.988         | 98.9005                                          |
| 500.       | 439.356         | 100.477                                          |

|      |         |         |
|------|---------|---------|
| 505. | 439.793 | 102.069 |
| 510. | 440.293 | 103.663 |
| 515. | 440.852 | 105.250 |
| 520. | 441.461 | 106.817 |
| 525. | 442.113 | 108.357 |
| 530. | 442.802 | 109.861 |
| 535. | 443.520 | 111.322 |
| 540. | 444.260 | 112.734 |
| 545. | 445.016 | 114.093 |
| 550. | 445.781 | 115.396 |
| 555. | 446.551 | 116.639 |
| 560. | 447.319 | 117.821 |
| 565. | 448.082 | 118.942 |
| 570. | 448.835 | 120.001 |
| 575. | 449.574 | 120.999 |
| 580. | 450.297 | 121.938 |
| 585. | 451.001 | 122.819 |
| 590. | 451.684 | 123.645 |
| 595. | 452.344 | 124.418 |
| 600. | 452.980 | 125.140 |
| 605. | 453.591 | 125.814 |
| 610. | 454.177 | 126.444 |
| 615. | 454.737 | 127.032 |
| 620. | 455.270 | 127.581 |
| 625. | 455.778 | 128.094 |
| 630. | 456.260 | 128.573 |
| 635. | 456.718 | 129.022 |
| 640. | 457.150 | 129.442 |
| 645. | 457.560 | 129.836 |
| 650. | 457.946 | 130.205 |
| 655. | 458.311 | 130.552 |
| 660. | 458.654 | 130.878 |
| 665. | 458.978 | 131.185 |
| 670. | 459.283 | 131.473 |
| 675. | 459.569 | 131.744 |
| 680. | 459.839 | 131.998 |
| 685. | 460.092 | 132.236 |
| 690. | 460.331 | 132.459 |
| 695. | 460.555 | 132.666 |
| 700. | 460.765 | 132.858 |
| 705. | 460.963 | 133.035 |
| 710. | 461.149 | 133.196 |
| 715. | 461.323 | 133.341 |
| 720. | 461.487 | 133.470 |
| 725. | 461.640 | 133.583 |
| 730. | 461.784 | 133.678 |
| 735. | 461.919 | 133.756 |
| 740. | 462.045 | 133.815 |
| 745. | 462.162 | 133.855 |
| 750. | 462.271 | 133.876 |

5. Training Data for Future Predictions with Diurnal Cycle of Cloud Depth:

| Time (min) | Cloud Depth (m) | Cloud Droplet Concentration ( $\text{cm}^{-3}$ ) |
|------------|-----------------|--------------------------------------------------|
| 24.0       | 200.000         | 50.0000                                          |

|       |         |         |
|-------|---------|---------|
| 28.8  | 223.251 | 63.8391 |
| 33.6  | 244.795 | 76.6141 |
| 38.4  | 264.761 | 88.4070 |
| 43.2  | 283.272 | 99.2932 |
| 48.0  | 300.439 | 109.342 |
| 52.8  | 316.404 | 118.322 |
| 57.6  | 331.244 | 125.968 |
| 62.4  | 344.999 | 132.311 |
| 67.2  | 357.732 | 137.389 |
| 72.0  | 369.510 | 141.254 |
| 76.8  | 380.399 | 143.961 |
| 81.6  | 390.453 | 145.572 |
| 86.4  | 399.725 | 146.156 |
| 91.2  | 408.261 | 145.787 |
| 96.0  | 416.108 | 144.544 |
| 100.8 | 423.307 | 142.506 |
| 105.6 | 429.896 | 139.752 |
| 110.4 | 435.910 | 136.361 |
| 115.2 | 441.378 | 132.412 |
| 120.0 | 446.330 | 127.981 |
| 124.8 | 450.787 | 123.141 |
| 129.6 | 454.771 | 117.961 |
| 134.4 | 458.299 | 112.509 |
| 139.2 | 461.385 | 106.848 |
| 144.0 | 464.038 | 101.038 |
| 148.8 | 466.266 | 95.1346 |
| 153.6 | 468.071 | 89.1916 |
| 158.4 | 469.454 | 83.2582 |
| 163.2 | 470.410 | 77.3812 |
| 168.0 | 470.930 | 71.6044 |
| 172.8 | 471.001 | 65.9692 |
| 177.6 | 470.604 | 60.5149 |
| 182.4 | 469.717 | 55.2790 |
| 187.2 | 468.308 | 50.2974 |
| 192.0 | 466.341 | 45.6049 |
| 196.8 | 463.774 | 41.2357 |
| 201.6 | 460.557 | 37.2233 |
| 206.4 | 456.631 | 33.6016 |
| 211.2 | 451.935 | 30.4043 |
| 216.0 | 446.403 | 27.6663 |
| 220.8 | 439.972 | 25.4228 |
| 225.6 | 432.589 | 23.7102 |
| 230.4 | 424.230 | 22.5657 |
| 235.2 | 414.916 | 22.0270 |
| 240.0 | 404.753 | 22.1314 |
| 244.8 | 393.963 | 22.9144 |
| 249.6 | 382.922 | 24.4075 |
| 254.4 | 372.178 | 26.6347 |
| 259.2 | 362.414 | 29.6077 |
| 264.0 | 354.363 | 33.3193 |
| 268.8 | 348.654 | 37.7371 |
| 273.6 | 345.676 | 42.7951 |
| 278.4 | 345.503 | 48.3896 |
| 283.2 | 347.906 | 54.3782 |
| 288.0 | 352.452 | 60.5861 |
| 292.8 | 358.619 | 66.8185 |

|       |         |         |
|-------|---------|---------|
| 297.6 | 365.894 | 72.8774 |
|-------|---------|---------|

6. Training Data for Past Reconstructions with Diurnal Cycle of Cloud Depth:

| Time (min) | Cloud Depth (m) | Cloud Droplet Concentration ( $\text{cm}^{-3}$ ) |
|------------|-----------------|--------------------------------------------------|
| 450.       | 429.017         | 22.7027                                          |
| 455.       | 419.655         | 21.8079                                          |
| 460.       | 409.239         | 21.5848                                          |
| 465.       | 397.945         | 22.0818                                          |
| 470.       | 386.117         | 23.3429                                          |
| 475.       | 374.302         | 25.4040                                          |
| 480.       | 363.244         | 28.2879                                          |
| 485.       | 353.799         | 31.9976                                          |
| 490.       | 346.765         | 36.5074                                          |
| 495.       | 342.689         | 41.7535                                          |
| 500.       | 341.735         | 47.6273                                          |
| 505.       | 343.680         | 53.9727                                          |
| 510.       | 348.033         | 60.5925                                          |
| 515.       | 354.179         | 67.2640                                          |
| 520.       | 361.514         | 73.7595                                          |
| 525.       | 369.521         | 79.8674                                          |
| 530.       | 377.798         | 85.4081                                          |
| 535.       | 386.054         | 90.2430                                          |
| 540.       | 394.086         | 94.2764                                          |
| 545.       | 401.762         | 97.4541                                          |
| 550.       | 408.997         | 99.7572                                          |
| 555.       | 415.739         | 101.197                                          |
| 560.       | 421.960         | 101.806                                          |
| 565.       | 427.644         | 101.636                                          |
| 570.       | 432.789         | 100.749                                          |
| 575.       | 437.396         | 99.2147                                          |
| 580.       | 441.471         | 97.1073                                          |
| 585.       | 445.021         | 94.5038                                          |
| 590.       | 448.057         | 91.4815                                          |
| 595.       | 450.586         | 88.1166                                          |
| 600.       | 452.617         | 84.4834                                          |
| 605.       | 454.157         | 80.6537                                          |
| 610.       | 455.212         | 76.6961                                          |
| 615.       | 455.786         | 72.6757                                          |
| 620.       | 455.882         | 68.6538                                          |
| 625.       | 455.499         | 64.6882                                          |
| 630.       | 454.637         | 60.8325                                          |
| 635.       | 453.294         | 57.1371                                          |
| 640.       | 451.468         | 53.6482                                          |
| 645.       | 449.154         | 50.4090                                          |
| 650.       | 446.354         | 47.4589                                          |
| 655.       | 443.071         | 44.8344                                          |
| 660.       | 439.312         | 42.5684                                          |
| 665.       | 435.096         | 40.6907                                          |
| 670.       | 430.456         | 39.2279                                          |
| 675.       | 425.441         | 38.2025                                          |
| 680.       | 420.122         | 37.6333                                          |
| 685.       | 414.599         | 37.5341                                          |
| 690.       | 408.999         | 37.9134                                          |
| 695.       | 403.474         | 38.7729                                          |

|      |         |         |
|------|---------|---------|
| 700. | 398.199 | 40.1063 |
| 705. | 393.357 | 41.8982 |
| 710. | 389.122 | 44.1226 |
| 715. | 385.643 | 46.7418 |
| 720. | 383.024 | 49.7060 |
| 725. | 381.316 | 52.9537 |
| 730. | 380.513 | 56.4131 |
| 735. | 380.560 | 60.0046 |
| 740. | 381.363 | 63.6448 |
| 745. | 382.802 | 67.2498 |
| 750. | 384.749 | 70.7403 |
